# Supplementary material for: Responses of Three Pedicularis Species to Geological and Climatic Changes in the Qinling Mountains and Adjacent Areas in East Asia
Source: MDPI journal article supplement (doi:10.3390/plants13060765), 2024-03-08
Supplement: s1 [file s1]

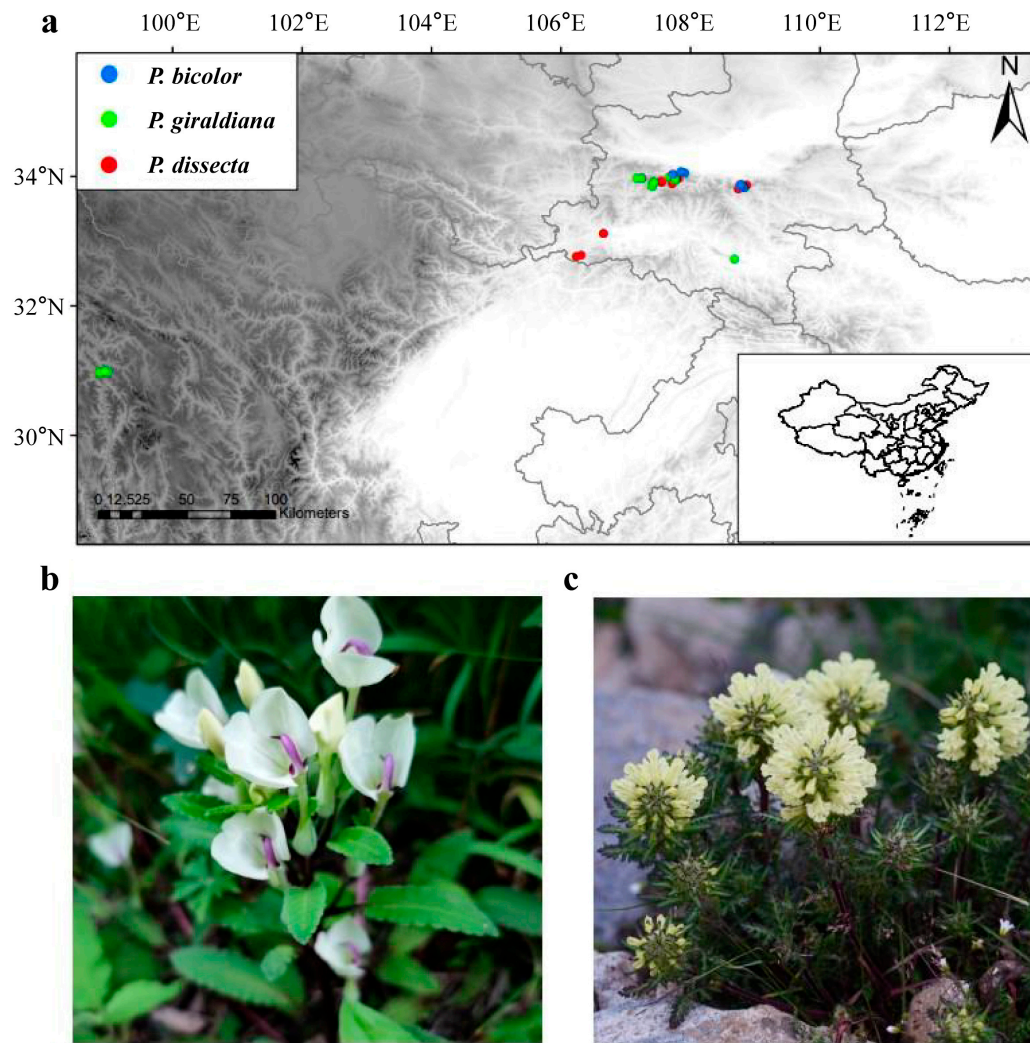

**Figure S1.** Geographical distribution of sampled populations of three *Pedicularis* species. (a) blue, green, and red indicate *P. bicolor*, *P. dissecta* and *P. giraldiana*, respectively. Photographs of representative individuals of (b) *P. bicolor* and (c) *P. giraldiana*

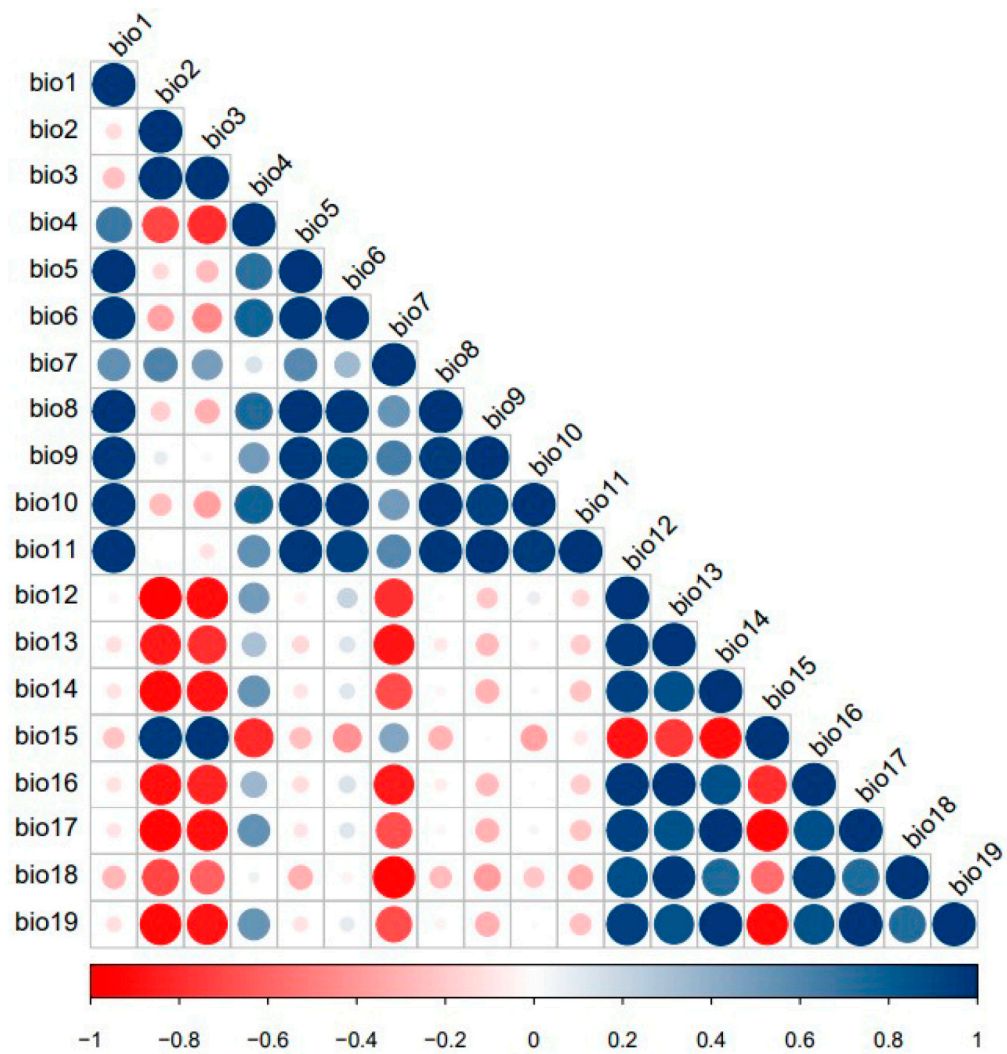

**Figure S2.** Correlation analysis of various environmental factors. Red represents positive correlations and blue represents negative correlations.

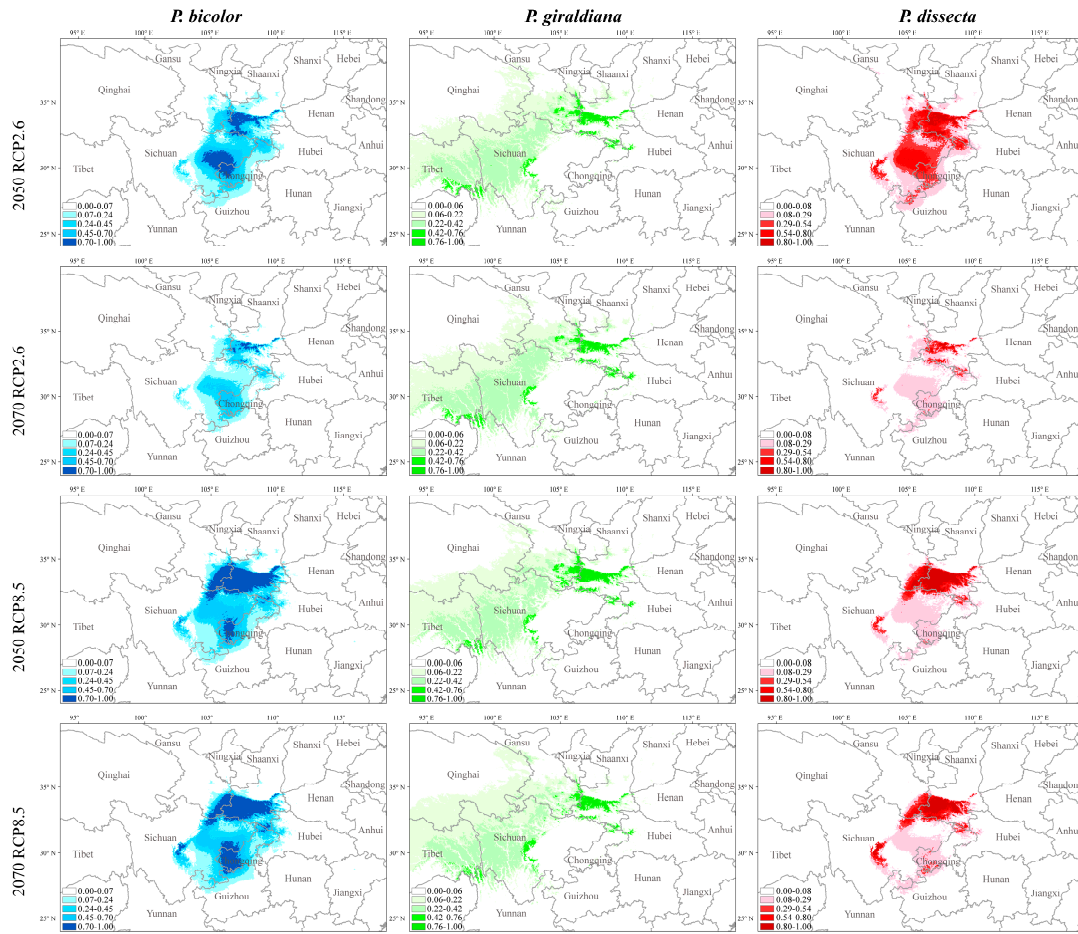

**Figure S3.** Prediction of potential geographical distributions of three *Pedicularis* species in different climatic scenarios in the future based on ecological niche modeling.

**Table S1.** Taxa and GenBank accessions used in phylogeny and divergence time analysis.

| <b>Taxon</b>                                   | <b>Accession</b> | <b>Chloroplast Genome (bp)</b> |
|------------------------------------------------|------------------|--------------------------------|
| <i>Pedicularis cheilanthifolia</i>             | MT040754         | 147,807                        |
| <i>Pedicularis longiflora</i>                  | NC_046852        | 153,547                        |
| <i>Pedicularis verticillata</i>                | MT040753         | 142,733                        |
| <i>Pedicularis hallaisanensis</i>              | NC_037433        | 143,469                        |
| <i>Pedicularis muscicola</i>                   | NC_046853        | 152,907                        |
| <i>Pedicularis resupinata</i>                  | NC_046397        | 153,145                        |
| <i>Pedicularis oederi</i>                      | NC_046854        | 153,139                        |
| <i>Pedicularis oederi</i> var. <i>sinensis</i> | MW770457         | 153,770                        |
| <i>Pedicularis dissecta</i>                    | NC_056312        | 152,120                        |
| <i>Pedicularis shansiensis</i>                 | NC_058762        | 151,902                        |
| <i>Pedicularis ishidoyana</i>                  | NC_029700        | 152,571                        |
| <i>Orobanche pancicii</i>                      | NC_031443        | 88,525                         |
| <i>Orobanche crenata</i>                       | NC_024845        | 87,529                         |
| <i>Orobanche rapum-genistae</i>                | NC_031444        | 91,517                         |
| <i>Orobanche densiflora</i>                    | NC_031442        | 83,024                         |
| <i>Siphocranion macranthum</i>                 | MT473779         | 152,126                        |
| <i>Siphocranion flavidum</i>                   | MT473778         | 152,039                        |
| <i>Scutellaria baicalensis</i>                 | NC_027262        | 152,731                        |

**Table S2.** Environmental variable information of distribution area prediction.

| Type    | Variables | Descriptions                                             | Units |
|---------|-----------|----------------------------------------------------------|-------|
| Climate | bio1      | Annual Mean Temperature                                  | °C    |
|         | bio2      | Mean Diurnal Range (Mean of monthly (max temp-min temp)) | °C    |
|         | bio3      | Isothermality (bio2/bio7) (×100)                         | /     |
|         | bio4      | Temperature Seasonality (standard deviation ×100)        | /     |
|         | bio5      | Max Temperature of Warmest Month                         | °C    |
|         | bio6      | Min Temperature of Coldest Month                         | °C    |
|         | bio7      | Temperature Annual Range (bio5-bio6)                     | °C    |
|         | bio8      | Mean Temperature of Wettest Quarter                      | °C    |
|         | bio9      | Mean Temperature of Driest Quarter                       | °C    |
|         | bio10     | Mean Temperature of Warmest Quarter                      | °C    |
|         | bio11     | Mean Temperature of Coldest Quarter                      | °C    |
|         | bio12     | Annual Precipitation                                     | mm    |
|         | bio13     | Precipitation of Wettest Month                           | mm    |
|         | bio14     | Precipitation of Driest Month                            | mm    |
|         | bio15     | Precipitation Seasonality (Coefficient of Variation)     | /     |
|         | bio16     | Precipitation of Wettest Quarter                         | mm    |
|         | bio17     | Precipitation of Driest Quarter                          | mm    |
|         | bio18     | Precipitation of Warmest Quarter                         | mm    |
|         | bio19     | Precipitation of Coldest Quarter                         | mm    |
